# Supplementary material
Source: PubMed Central journal article supplement (PMC5756489)
Supplement: jgv-97-2387-s001.pdf [file jgv-97-2387-s001.pdf]

## Supplementary Figures

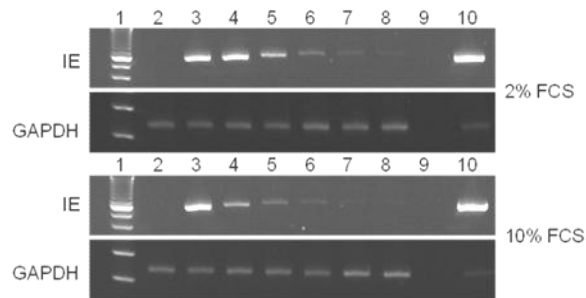

### Supplementary Fig. S1

A representative image for the genome maintenance over time in reduced and 10% serum conditions as determined by end-point PCR. THP-1 cells grown in serum-reduced conditions or in 10% serum were mock infected (lane 2) or infected at MOI 5 (lanes 3-10). DNA samples were prepared 1 day (lane 2 and lane 3), 3 days (lane 4), 6 days (lane 5), 9 days (lane 6), 13 days (lane 7) and 20 days post-infection (lane 8). End-point PCR for the viral IE region and the cellular control GAPDH was performed on input normalized total DNA. A 100bp ladder (Life Technologies) was used to verify the amplicon size (lane 1), as a positive control DNA of infected HFF (lane 10, MOI 5, 3 days p.i.) was amplified. A no template control is shown in lane 9.
